# Supplementary material for: Rhinovirus Genome Variation during Chronic Upper and Lower Respiratory Tract Infections
Source: PubMed Central journal article supplement (PMC3119694; doi:10.1371/journal.pone.0021163), 2011-06-21

C

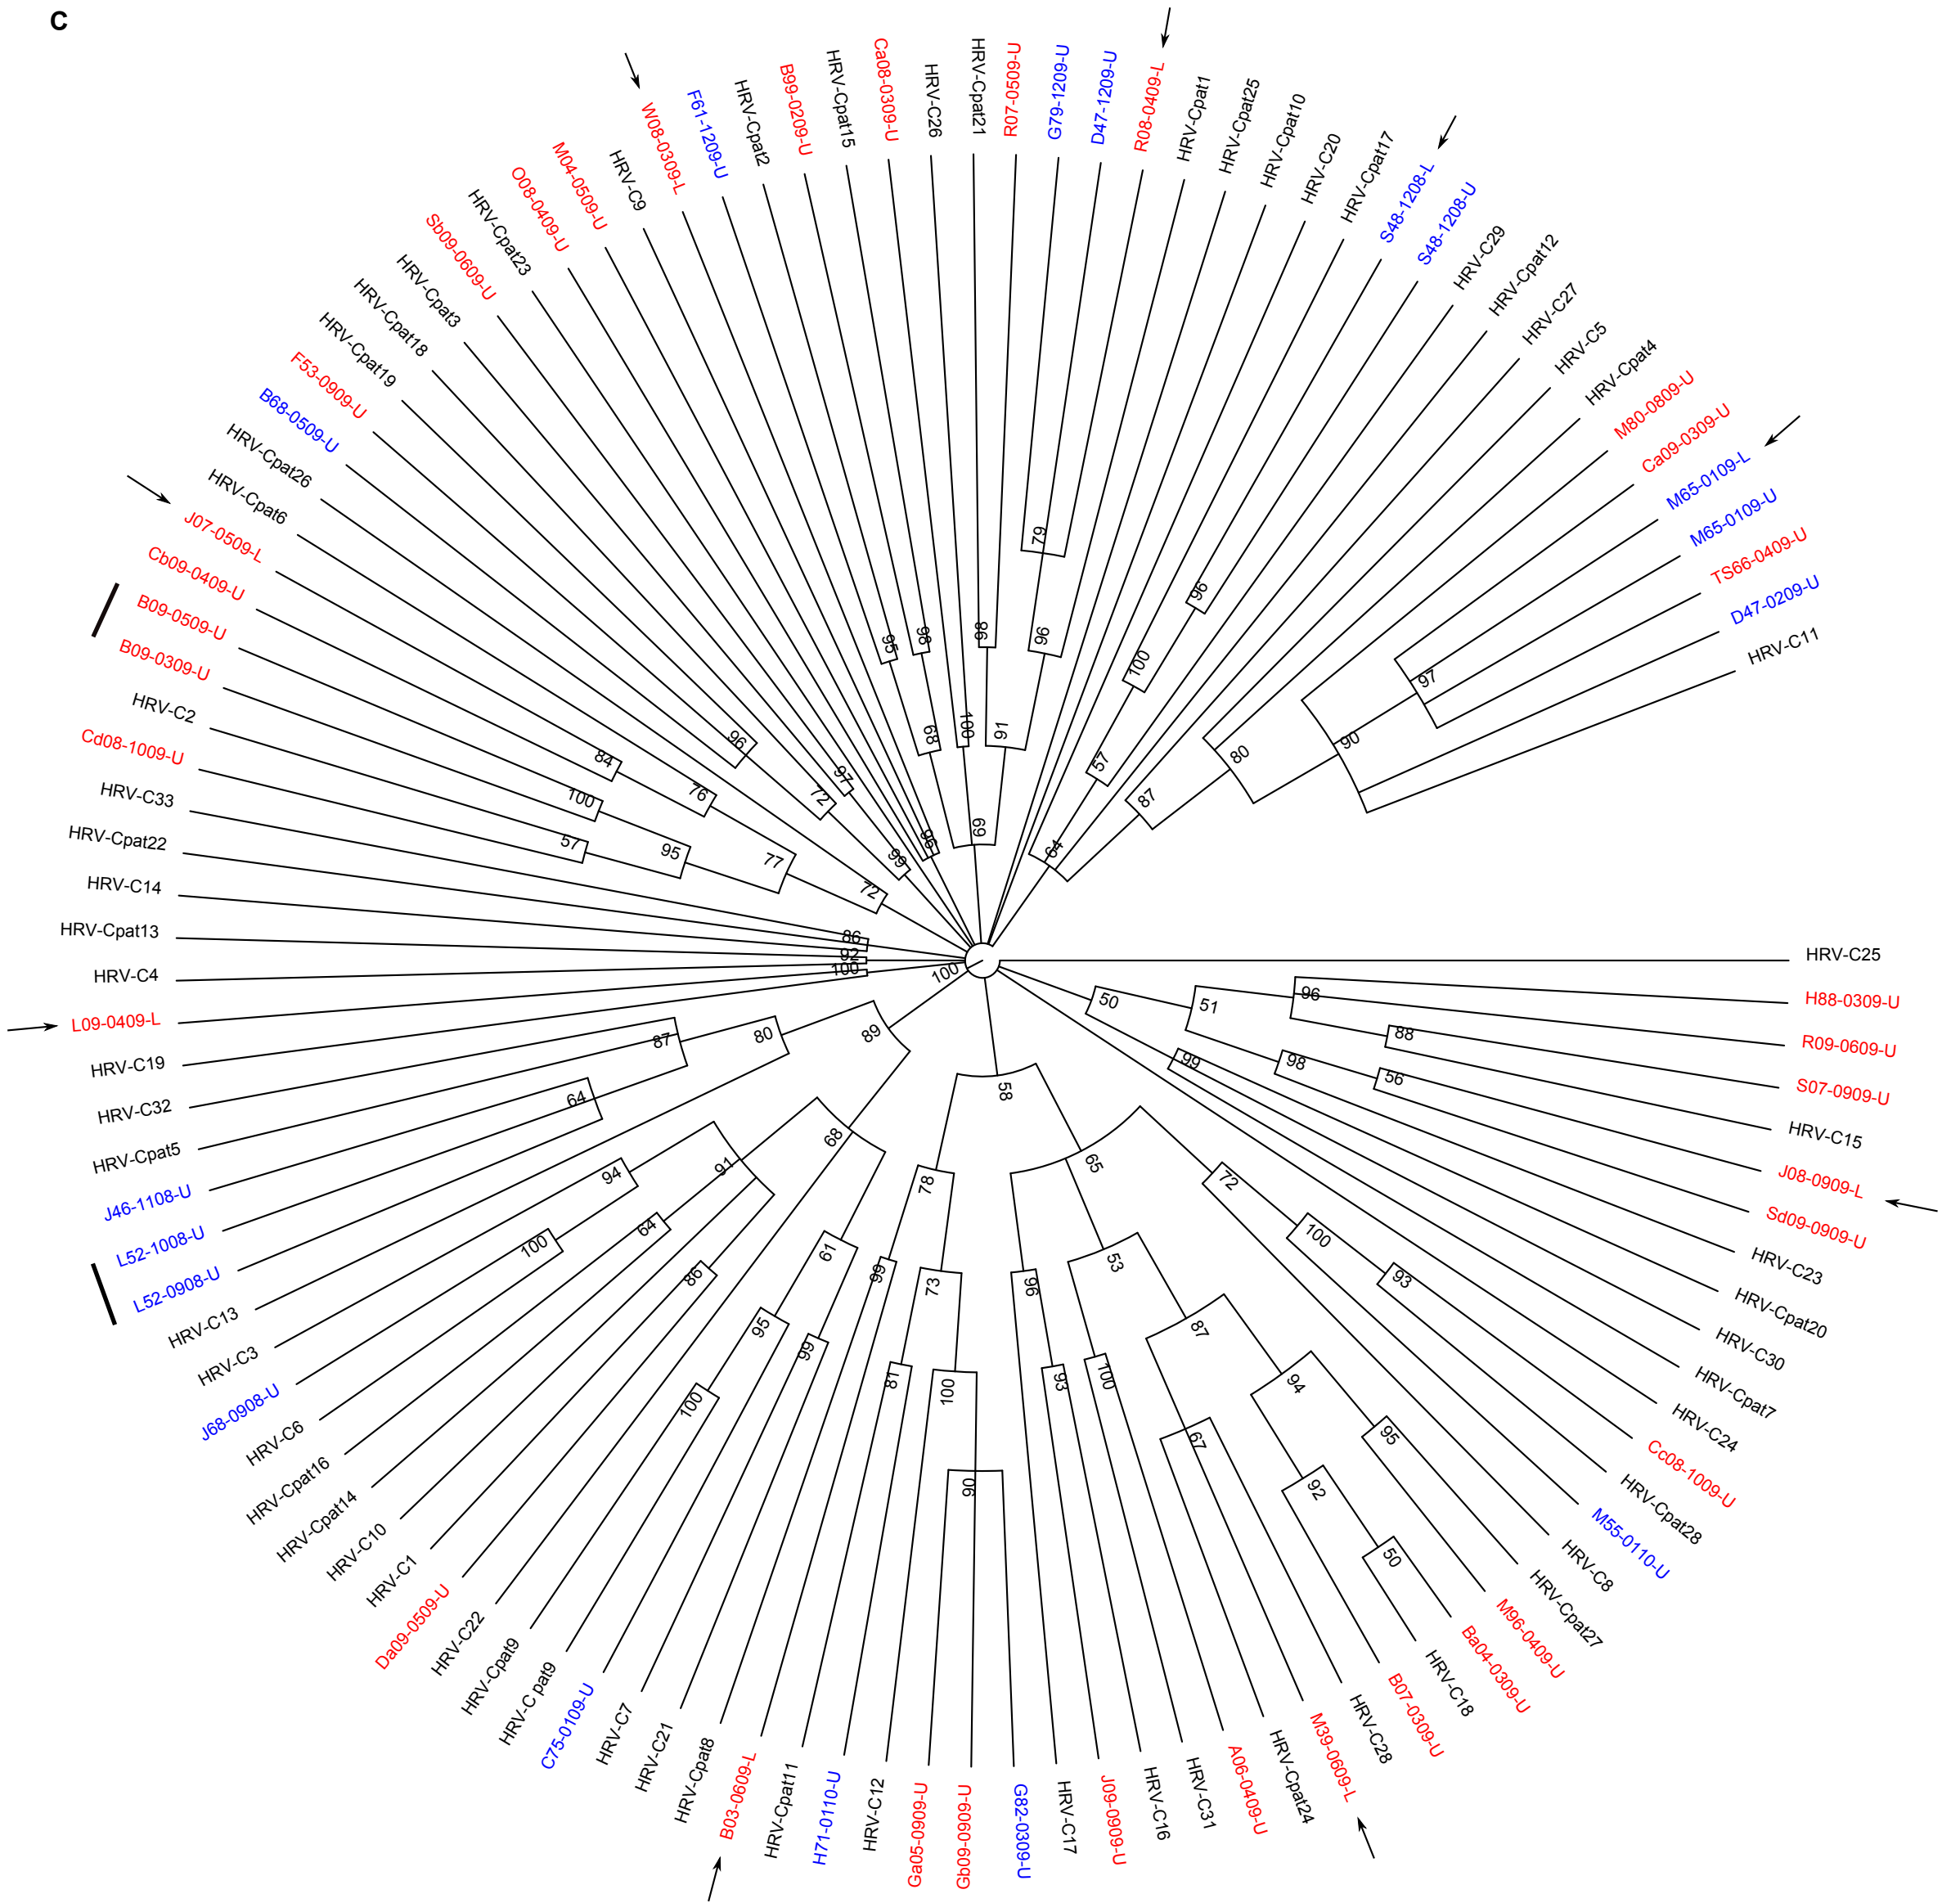

Supplement: pone.0021163.s001.pdf [file pone.0021163.s001.pdf]
